# Supplementary material for: The Effectiveness of Prompts to Promote Engagement With Digital Interventions: A Systematic Review
Source: PubMed Central journal article supplement (PMC4723726; doi:10.2196/jmir.4790), 2016-01-08
Supplement: jmir_v18i1e6_app2.pdf [file jmir_v18i1e6_app2.pdf]

|                      | Random sequence generation (selection bias) | Allocation concealment (selection bias) | Blinding of participants and personnel (performance bias) | Incomplete outcome data (attrition bias) | Selective reporting (reporting bias) | Other bias |
|----------------------|---------------------------------------------|-----------------------------------------|-----------------------------------------------------------|------------------------------------------|--------------------------------------|------------|
| Berger et al [39]    | +                                           | +                                       | -                                                         | ?                                        | ?                                    | +          |
| Berger et al [40]    | +                                           | +                                       | ?                                                         | +                                        | +                                    | +          |
| Clarke et al [35]    | +                                           | +                                       | -                                                         | +                                        | ?                                    | +          |
| Couper et al [11]    | ?                                           | ?                                       | ?                                                         | +                                        | ?                                    | +          |
| Farrer et al [36]    | ?                                           | +                                       | ?                                                         | +                                        | ?                                    | +          |
| Greaney et al [41]   | ?                                           | ?                                       | -                                                         | +                                        | +                                    | +          |
| McClure et al [37]   | +                                           | +                                       | ?                                                         | +                                        | ?                                    | +          |
| Munoz et al [42]     | +                                           | +                                       | -                                                         | +                                        | ?                                    | +          |
| Proudfoot et al [43] | +                                           | +                                       | +                                                         | +                                        | +                                    | +          |
| Santucci et al [45]  | ?                                           | ?                                       | ?                                                         | +                                        | +                                    | +          |
| Schneider et al [44] | +                                           | +                                       | ?                                                         | +                                        | +                                    | +          |
| Schneider et al [46] | +                                           | +                                       | -                                                         | +                                        | ?                                    | +          |
| Simon et al [38]     | ?                                           | ?                                       | ?                                                         | +                                        | +                                    | +          |
| Titov et al [47]     | +                                           | +                                       | ?                                                         | +                                        | ?                                    | +          |
