# Supplementary material for: The Effectiveness of Prompts to Promote Engagement With Digital Interventions: A Systematic Review
Source: PubMed Central journal article supplement (PMC4723726; doi:10.2196/jmir.4790), 2016-01-08
Supplement: jmir_v18i1e6_app5.pdf [file jmir_v18i1e6_app5.pdf]

| Study (author name, year) | Included study arms                                                                             | Dichotomous outcomes                                                        |                                                                                         | Continuous outcomes                                             |                                                                                                                                                          |
|---------------------------|-------------------------------------------------------------------------------------------------|-----------------------------------------------------------------------------|-----------------------------------------------------------------------------------------|-----------------------------------------------------------------|----------------------------------------------------------------------------------------------------------------------------------------------------------|
|                           |                                                                                                 | Outcome                                                                     | Result                                                                                  | Outcome                                                         | Result                                                                                                                                                   |
| Berger et al [39]         | pure self-help: (n = 26)<br>guided self-help : (n =24 )<br>step-up of support on demand: (n=25) |                                                                             |                                                                                         | Mean number of lessons completed (five lessons)                 | pure self-help: mean 4.3 lessons (SD = 1.18)<br>guided self-help: mean 4.5 lessons (SD =.95)<br>step-up of support on demand: mean 4.6 lessons (SD =.98) |
| Berger et al [40]         | unguided self-help: (n = 25)<br>guided self-help: (n = 25)                                      | Number of participants who completed the ten lessons                        | unguided self-help: n(%) =9 (36%)<br>guided self-help: n(%)= 14 (56%)                   | Mean number of lessons completed (ten lessons)                  | unguided self-help: mean 6.8(SD=3.75)<br>guided self-help: mean 8.52(SD=2.86)                                                                            |
| Clarke et al [35]         | mail reminders: (n=75)<br>telephone reminders: (n=80)                                           |                                                                             |                                                                                         | Mean number of log-ins                                          | mail reminders: mean= 5.9(SD =6.2)<br>telephone reminders: mean= 5.6 (SD=5.8)                                                                            |
| Couper et al [11]         | tailored: (n = 839)<br>tailored + human online behavioral intervention (HOBI): (n = 838)        |                                                                             |                                                                                         | Mean total minutes devoted to the intervention website          | tailored: mean = 44.1<br>tailored + HOBI : mean= 46.7                                                                                                    |
| Farrer et al [36]         | web only: (n=38)<br>web with tracking: (n=45)                                                   | Number of participants who completed all five moodgym modules               | web only: n(%) =6 (15.8%)<br>web with tracking: n(%)=8 (17.8%)                          | Mean number of completed MoodGYM program modules (five modules) | web only: mean = 1.5 (SD=1.89)<br>web with tracking: mean= 2.0 (SD=1.88)                                                                                 |
| Greaney et al [41]        | automated assistance (AA): (n=36)<br>automated assistance + calls (AAC): (n=50)                 | Number of participants who reached the minimum threshold of self-monitoring | During week two: AA: (%)=10<br>AAC:(%)=22<br>During week three: AA:(%)=14<br>AAC:(%)=26 |                                                                 |                                                                                                                                                          |

|                      |                                                                                      |                                                                                                       |                                                                                                 |                                                    |                                                                      |
|----------------------|--------------------------------------------------------------------------------------|-------------------------------------------------------------------------------------------------------|-------------------------------------------------------------------------------------------------|----------------------------------------------------|----------------------------------------------------------------------|
|                      |                                                                                      | at least one behavior three or more times per week during the prompting periods (week two and three)  |                                                                                                 |                                                    |                                                                      |
| McClure et al [37]   | no proactive email reminders : (n=932)<br>proactive email reminders : (n=933)        | Proportion of participants viewing content who logged in/visited the DI                               | no proactive email reminders :n(%)=579 (62.12%)<br>proactive email reminders: n(%)=595 (63.88%) |                                                    |                                                                      |
| Munoz et al [42]     | Guía: (n=247)<br>Guía+ Individually Timed Educational Messages (ITEMs): (n= 251)     | Utilization of a cigarette counter and online journal <sup>1</sup>                                    |                                                                                                 |                                                    |                                                                      |
| Proudfoot et al[43]  | Bipolar Education Program (BEP): (n = 139)<br>BEP+Informed Supporters(IS): (n = 134) | Number of participants who completed and returned four or more sessions of the eight sessions program | BEP: n(%)= 96 (69.1%)<br>BEP+ IS: n(%)= 107(79.9%)                                              |                                                    |                                                                      |
| Santucci et al [45]  | no reminder: (n=22)<br>reminder: (n=21)                                              | Number of participants who completed all eight sessions                                               | no reminder: n=3<br>reminder: n=3                                                               | Mean number of sessions completed (eight sessions) | no reminder: mean = 3.6 (SD =2.3)<br>reminder: mean = 2.9 (SD = 2.5) |
| Schneider et al [46] | no prompting: (n=1658)<br>prompting: (n=1790)                                        | Number of participants who visited the program during the one month follow up                         | No prompting: n(%)=0(0)<br>prompting:n(%)=113(6.3%)                                             |                                                    |                                                                      |

|                      |                                                                                                                                                                                                                                                       |                                                                      |                                                                                                                                                                                                                              |                       |                                            |
|----------------------|-------------------------------------------------------------------------------------------------------------------------------------------------------------------------------------------------------------------------------------------------------|----------------------------------------------------------------------|------------------------------------------------------------------------------------------------------------------------------------------------------------------------------------------------------------------------------|-----------------------|--------------------------------------------|
| Schneider et al [44] | no prompt (NP): (n=34)<br>standard prompt (SP)at two weeks: (n=34)<br>SP at four weeks : (n=34)<br>SP at six weeks: (n=35) standard prompt and additional content (SP+) at two weeks: (n=36)<br>SP+ at four weeks: (n=35)<br>SP+ at six weeks: (n=32) | Number of participants who logged in/visited the DI                  | NP: n(%) =2(5.9)<br>SP at two weeks :n(%) =6(17.6)<br>SP at four weeks : n(%) =1(2.9)<br>SP at six weeks: n(%) =1(2.9)<br>SP+ at two weeks: n(%) =10(27.8)<br>SP+ at four weeks: n(%) =7(20)<br>SP+ at six weeks: n(%) =0(0) |                       |                                            |
| Simon et al [38]     | program only (n=54)<br>coaching (n=64)                                                                                                                                                                                                                | Number of participants who returned after initial sign up at anytime | Program only: n(%)= 24(44%)<br>coaching: n(%)=45(71%)                                                                                                                                                                        |                       |                                            |
| Titov et al [47]     | computerized cognitive behaviour therapy (CCBT): (n=82)<br>CCBT+Telephone: (n=81)                                                                                                                                                                     |                                                                      |                                                                                                                                                                                                                              | Mean number of logins | CCBT: mean= 23<br>CCBT+Telephone: Mean =23 |

<sup>1</sup>The results were not reported separately for each arm
